# Supplementary material for: Monitoring the effect of drinking via heartbeat-referenced facial temperature changes using Synchro-thermography
Source: Research Square preprint supplement (doi:10.21203/rs.3.rs-6837503/v1), 2025-06-27
Supplement: Supplementary file [file accb667d92abf3f89ac90d05.pdf]

**Table S1.** Correspondence between measurement areas and anatomy

| ROIs | Names of regions             | Anatomical vascularity              |
|------|------------------------------|-------------------------------------|
| ST   | Supratrochlear               | Supratrochlear artery               |
| TEMP | Temporal                     | Superficial temporal artery         |
| MPC  | Medial palpebral commissure  | Dorsal nasal artery, Angular artery |
| LPC  | Lateral palpebral commissure | Zygomatico-orbital artery           |
| NOSE | Nose                         | Dorsal nasal artery                 |
| NL   | Nasolabial                   | Superior labial branch              |
| CHK  | cheek                        | Transverse facial artery            |
| TMJ  | Temporomandibular joint      | Superficial temporal artery         |
| EAM  | External acoustic meatus     | Posterior auricular artery          |
| LC   | Labial commissure            | Facial artery                       |
| IL   | Inferior labial              | Inferior labial branch              |
| JAW  | jaw                          | Facial artery                       |

**Table S2.** Emoji questionnaire

|                |            |                |               |            |            |
|----------------|------------|----------------|---------------|------------|------------|
| 🤔 angry        | 😞 confused | 😱 scared       | 😂 laughing    | 🤪 crazy    | ❤️ love    |
| 😫 exhausted    | 😭 crying   | 😬 awkward      | 😳 embarrassed | 😊 smiling  | 😄 happy    |
| 😴 tired        | 😓 helpless | 😏 smirk        | 😜 silly       | 😏 joke     | 😘 kissing  |
| 😞 bad          | 😓 stressed | 😞 dissatisfied | 😐 neutral     | 😄 grinning | 😊 blushing |
| 😞 disappointed | 😞 sad      | 😞 unhappy      | 😐 indifferent | 😴 sleepy   | 😊 relief   |

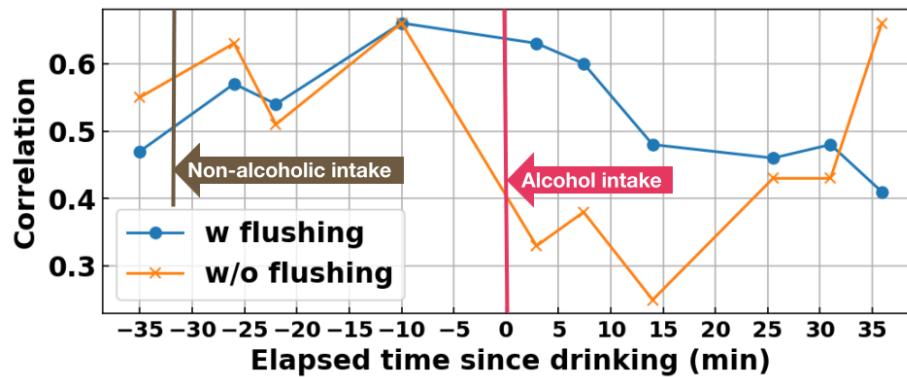**Figure S1.** Correlation coefficients between facial temperature and heart rate variability in participants with flushing response (Figure 6) and without flushing response (Figure 7)
